# Supplementary material for: Ritonavir Has Reproductive Toxicity Depending on Disrupting PI3K/PDK1/AKT Signaling Pathway
Source: MDPI journal article supplement (doi:10.3390/toxics12010073), 2024-01-15
Supplement: s1 [file s1]

## Supplementary Material

### **Ritonavir has reproductive toxicity depending on disrupting PI3K/PDK1/AKT signaling pathway**

Eun-Ju Jung<sup>a</sup>, Jae-Hwan Jo<sup>b</sup>, Claudine Uwamahoro<sup>a</sup>, Seung-Ik Jang<sup>a</sup>, Woo-Jin Lee<sup>a</sup>, Ju-Mi Hwang<sup>a</sup>, Jeong-Won Bae<sup>a</sup>, and Woo-Sung Kwon<sup>a,b,c,\*</sup>

<sup>a</sup>Department of Animal Science and Biotechnology, Kyungpook National University, Sangju, Gyeongsangbuk-do 37224, Republic of Korea

<sup>b</sup>Department of Animal Biotechnology, Kyungpook National University, Sangju, Gyeongsangbuk-do 37224, Republic of Korea

<sup>c</sup>Research Institute for Innovative Animal Science, Kyungpook National University, Sangju, Gyeongsangbuk-do 37224, Republic of Korea

\*Corresponding author:

Department of Animal Science and Biotechnology, Department of Animal Biotechnology, and Research Institute for Innovative Animal Science

Kyungpook National University Sangju, Gyeongsangbuk-do 37224, Republic of Korea

Tel: +82.54.530.1942

Fax: +82.504.242.9851

E-mail: [wskwon@knu.ac.kr](mailto:wskwon@knu.ac.kr)

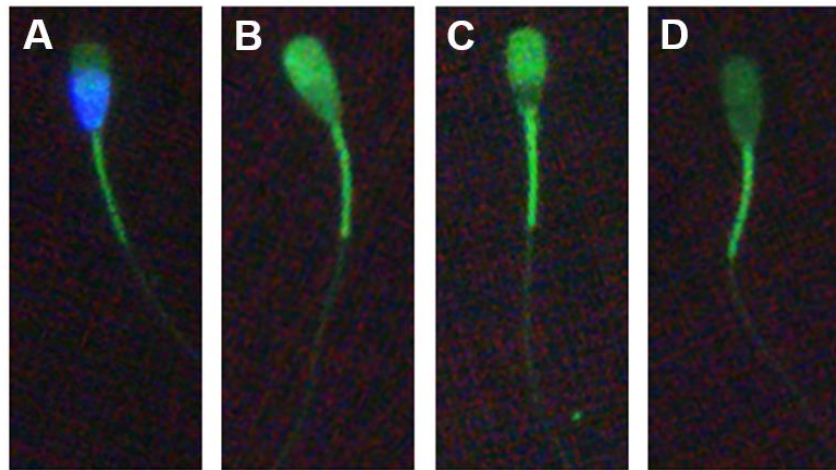

**Supplementary Figure S1. Representative images of CTC patterns.** (A) Dead sperm (D pattern, blue fluorescence on the sperm head). (B) Live non-capacitated sperm (F pattern, bright green fluorescence spread evenly on the sperm head). (C) Live capacitated sperm (B pattern, bright green fluorescence in acrosomal region). (D) Acrosome-reacted sperm (AR pattern, no fluorescence on the sperm head or bright green fluorescence only in the post-acrosomal region).
